# Supplementary material for: Adding Amino Acids to a Sucrose Diet Is Not Sufficient to Support Longevity of Adult Bumble Bees
Source: MDPI journal article supplement (doi:10.3390/insects11040247), 2020-04-15
Supplement: s1 [file s1]

## Supplementary Material

**Table S1.** Concentrations for ten essential amino acids, proline and other non-essential proteinogenic amino acids as found in the pollen mix used in the experiments, measured via ion exchange chromatography (IEC) [36,37,62]. \* Tryptophan could not be measured with IEC.

| Amino acid          | AAlow [ $\mu\text{g/g}$ ] |
|---------------------|---------------------------|
| Alanine (Ala)       | 162.93                    |
| Arginine (Arg)      | 63.3                      |
| Asparagine (Asn)    | 0                         |
| Aspartic acid (Asp) | 199.97                    |
| Cysteine (Cys)      | 4.18                      |
| Glutamine (Gln)     | 0                         |
| Glutamic acid (Glu) | 163.21                    |
| Glycine (Gly)       | 185                       |
| Histidine (His)     | 33.48                     |
| Isoleucine (Iso)    | 40.1                      |
| Leucine (Leu)       | 126.78                    |
| Lysine (Lys)        | 105.31                    |
| Methionine (Met)    | 31.7                      |
| Phenylalanine (Phe) | 54.77                     |
| Proline (Pro)       | 115.92                    |
| Serine (Ser)        | 143.79                    |
| Threonine (Thr)     | 84.83                     |
| Tryptophan (Trp)    | 0*                        |
| Tyrosine (Tyr)      | 38.72                     |
| Valine (Val)        | 54.33                     |

**Table 2.** Average concentrations for ten essential amino acids and proline as found in floral nectar of eight Fabaceae (*Trifolium hybridum*, *T. pratense*, *T. repens*, *T. campestre*, *Medicago varia*, *Onobrychis vicifolia*, *Vicia cracca* and *Lotus corniculatus*). Data from Venjakob, Klein and Leonhardt (unpublished data). \*We used the average concentration of all other amino acids for tryptophan, which could not be measured with ion exchange chromatography (IEC).

| Amino acid          | AAlow [ $\mu\text{g/ml}$ ] |
|---------------------|----------------------------|
| Arginine (Arg)      | 2.04                       |
| Histidine (His)     | 1.82                       |
| Isoleucine (Iso)    | 2.06                       |
| Leucine (Leu)       | 2.63                       |
| Lysine (Lys)        | 2.14                       |
| Methionine (Met)    | 3.56                       |
| Phenylalanine (Phe) | 4.39                       |
| Proline (Pro)       | 1.88                       |
| Threonine (Thr)     | 2.52                       |
| Tryptophan (Trp)    | 2.59*                      |
| Valine (Val)        | 2.89                       |
